# Supplementary material for: Extracellular matrix and biomimetic engineering microenvironment for neuronal differentiation
Source: PubMed Central journal article supplement — Neural Regen Res. 2019 Oct 18;15(4):573–85. doi: 10.4103/1673-5374.266907 (PMC6975142; doi:10.4103/1673-5374.266907), 2019-10-18
Supplement: NRR-15-573_Suppl1.pdf [file NRR-15-573_Suppl1.pdf]

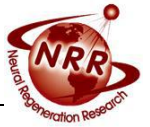

## OPEN PEER REVIEW REPORT 1

**Name of journal:** Neural Regeneration Research

**Manuscript NO:** NRR-D-19-00230

**Title:** Extracellular matrix and biomimetic engineering microenvironment for neuronal differentiation

**Reviewer's Name:** Olga Kopach

**Reviewer's country:** UK

**Date sent for review:** 2019-05-06

**Date reviewed:** 2019-05-12

### COMMENTS TO AUTHORS

This is an interesting overview, a good attempt of cross-linking the two different research areas, both sounding and challenging, such as extracellular matrix and neural stem cell research.

I would like to find more profound explanations given for the mechanistic basis of the improved neuronal differentiation of neural precursors on various surface topographies based on experimental data, e.g. numerous microfilament forming proteins underlying topographical guidance and cell modifications, etc.
