# Supplementary material for: Extracellular matrix and biomimetic engineering microenvironment for neuronal differentiation
Source: PubMed Central journal article supplement — Neural Regen Res. 2019 Oct 18;15(4):573–85. doi: 10.4103/1673-5374.266907 (PMC6975142; doi:10.4103/1673-5374.266907), 2019-10-18
Supplement: NRR-15-573_Suppl2.pdf [file NRR-15-573_Suppl2.pdf]

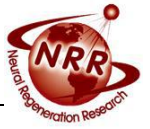

## OPEN PEER REVIEW REPORT 2

**Name of journal:** Neural Regeneration Research

**Manuscript NO:** NRR-D-19-00230

**Title:** Extracellular matrix and biomimetic engineering microenvironment for neuronal differentiation

**Reviewer's Name:** Amadi Ogonda Ihunwo

**Reviewer's country:** South Africa

**Date sent for review:** 2019-05-06

**Date reviewed:** 2019-05-20

### COMMENTS TO AUTHORS

The different levels of structural integrity from histological to ultrastructure followed by nanomolecules makes it an interesting review paper. The inclusion of the differential dimensions of the fibres do show clear differences at different developmental stages. This relates to the process of repair as it will involve both the cellular and fibrous constituents in the matrix.
